# Supplementary material
Source: Springer Nature journal article supplement (https://www.springermedizin.de/resource/supplementary/12985_2013_2546_MOESM14_ESM.pdf/9606946)

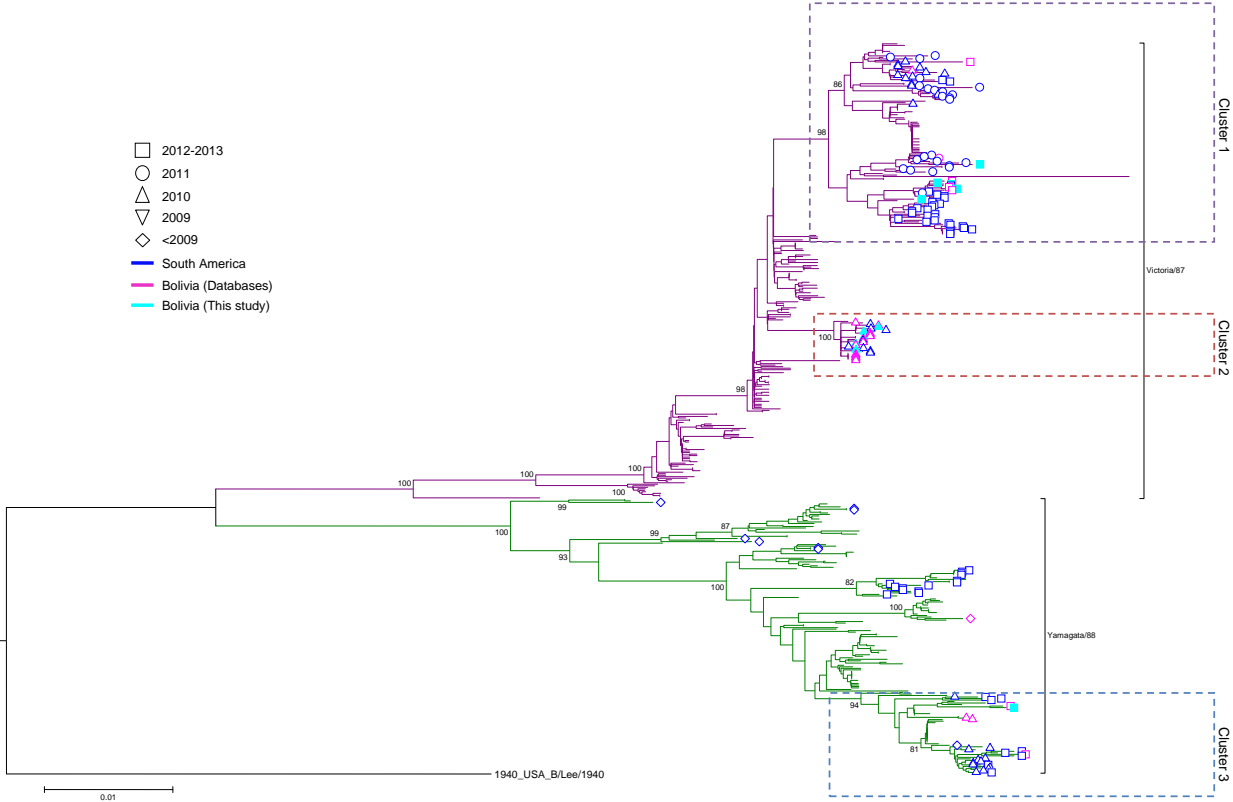

Supplement: MOESM14 [file 9606946]
